1 **Evolution in spatial and spatiotemporal variable metapopulations**  
2 **changes a herbivore's host plant range**

3  
4 **Authors:** De Roissart A<sup>1</sup>, Wybouw N<sup>2,3</sup>, Renault D<sup>4</sup>, Van Leeuwen T<sup>2,3</sup> & Bonte D<sup>1,\*</sup>

5  
6 **Affiliations:**

7 <sup>1</sup> Ghent University, Dep. Biology, Terrestrial Ecology Unit, K.L. Ledeganckstraat 35, B-9000  
8 Ghent, Belgium

9 <sup>2</sup> Ghent University, Dep. Crop Protection, Laboratory of Agrozoology, Coupure Links 653, B-  
10 9000 Ghent, Belgium

11 <sup>3</sup> University of Amsterdam, Institute for Biodiversity and Ecosystem Dynamics, Science Park  
12 904, 1098 XH Amsterdam, the Netherlands

13 <sup>4</sup> Université de Rennes 1, UMR 6553 ECOBIO CNRS, Avenue du Gal Leclerc 263, CS 74205,  
14 35042 Rennes Cedex, France

15  
16  
17 **\*Corresponding author:** Dries Bonte, Ghent University, Dep. Biology, Terrestrial Ecology  
18 Unit, K.L. Ledeganckstraat 35, B-9000 Ghent, Belgium. Email: [dries.bonte@ugent.be](mailto:dries.bonte@ugent.be); tel:  
19 0032 9 264 52 13; fax: 0032 9 264 87 94

20  
21 **E-mail address of the co-authors:** [Annelies.DeRoissart@ugent.be](mailto:Annelies.DeRoissart@ugent.be); [Dries.Bonte@ugent.be](mailto:Dries.Bonte@ugent.be);  
22 [N.R.Wybouw@uva.nl](mailto:N.R.Wybouw@uva.nl); [Thomas.VanLeeuwen@ugent.be](mailto:Thomas.VanLeeuwen@ugent.be); [David.Renault@univ-rennes1.fr](mailto:David.Renault@univ-rennes1.fr)

23  
24 **Manuscript type:** Original article

25  
26 **Running title:** Metapopulation structure and life history evolution

27  
28 **Key-words:** metapopulation-level selection, stochasticity, *Tetranychus urticae*

29  
30

31 **Abstract**

32 *The persistence and dynamics of populations largely depends on the way they are configured*  
33 *and integrated into space and the ensuing eco-evolutionary dynamics. We manipulated*  
34 *spatial and temporal variation in patch size in replicated experimental metapopulations of*  
35 *the herbivore mite Tetranychus urticae. Evolution over approximately 30 generations in the*  
36 *spatially and spatiotemporally variable metapopulations induced a significant divergence in*  
37 *life history traits, physiological endpoints and gene expression, but also a remarkable*  
38 *convergence relative to the stable reference patchy metapopulation in traits related to size*  
39 *and fecundity and in its transcriptional regulation. The observed evolutionary dynamics are*  
40 *tightly linked to demographic changes, more specifically frequent episodes of resource*  
41 *shortage, and increased the reproductive performance of mites on tomato, a challenging*  
42 *host plant. This points towards a general, adaptive stress response in stable spatial variable*  
43 *and spatiotemporal variable metapopulations that pre-adapts a herbivore arthropod to*  
44 *novel environmental stressors.*

45 Changes in land-use levy a strong pressure on our natural and pristine habitat and leads to  
46 habitat loss and isolation, which are both a major thread for biodiversity<sup>1</sup>. Species  
47 conservation therefore relies largely on optimal reserve planning which in turn is rooted  
48 within the principles of metapopulations<sup>2,3</sup>. This concept defines population-extinction  
49 dynamics and eventually extinction thresholds within in networks of interconnected habitat  
50 patches. Most spatially structured populations can be classified as *patchy* or *mainland-*  
51 *island* metapopulations<sup>4</sup>, and the omnipresence of classical Levin's metapopulations has  
52 been recently questioned<sup>5</sup>. This spatial variation in habitat availability not only affects patch  
53 occupancy dynamics, it also impacts the local- and metapopulation-level demography. Some  
54 of us<sup>6</sup> demonstrated experimentally that spatial variation in habitat availability decreases  
55 variance in metapopulation size at the metapopulation level. Conversely, spatiotemporal  
56 variation in habitat availability increases patch extinction rates, but decreases local  
57 population and metapopulation sizes. These demographic changes minimised  
58 metapopulation-level variability in mainland-island metapopulations, relative to classical and  
59 patchy ones.

60

61 Because of these changes in population dynamics, selection pressures in metapopulations  
62 are expected to act on more than one level of population structure<sup>7</sup>. For instance, in classical  
63 metapopulations where local population extinctions occur regularly, increased dispersal  
64 rates are selected since long-term survival is only possible if genotypes are able to re-  
65 colonise patches from where they have become locally extinct. With increasing asymmetry  
66 in patch size, however, dispersal will evolve to lower rates because benefits of dispersal are  
67 only prevalent for a minority of the individuals<sup>8</sup>. Additional and/or alternative adaptive  
68 strategies might also evolve through the adjustment of sex-ratio<sup>9</sup>, age-at-death<sup>10</sup> and  
69 density-dependency<sup>11</sup> according to changes in spatial structure and associated variation in  
70 the prevalence and strength of local resource competition<sup>12-14</sup> and other stressors<sup>15,16</sup>.

71

72 While evolutionary theory to date is centred on single trait dynamics, multivariate selection  
73 in life history and physiology is anticipated in response to changes in spatial habitat  
74 configuration. These evolutionary responses then simultaneously feedback on the ecological  
75 dynamics, rendering both ecology and evolution heavily intertwined. We now begin to  
76 understand such eco-evolutionary dynamics in either natural or experimental

77 metapopulations<sup>17</sup>. The importance of eco-evolutionary dynamics is most obvious in  
78 metapopulations where dispersal determines the genetic composition of different  
79 populations. Seminal examples include the Glanville fritillary<sup>18</sup> or stick insect  
80 metapopulations<sup>19</sup>. Often, these eco-evolutionary dynamics lead to evolutionary rescue, the  
81 process where adaptive evolution allows a population<sup>20</sup>, metapopulation<sup>17,21</sup> or an  
82 expanding population<sup>22</sup> to recover from negative growth as a result from environmental  
83 change<sup>20</sup>. Evolutionary rescue is known to be strongly determined by demographic and  
84 genetic factors of local populations, but also by entire metapopulation changes<sup>23</sup>.

85

86 The genetic basis of life history differentiation can now be disentangled by the development  
87 of several -omic approaches. Transcriptomic analyses may uncover genes that significantly  
88 alter their transcript levels as a response to the implemented selection pressure and provide  
89 detailed insights on the pleiotropic effects underlying phenotypic. For instance, in *Drosophila*  
90 *melanogaster*, many genes that are up- or downregulated in response to stress are equally  
91 associated with mobility and aggression<sup>24</sup>. In the spider mite *Tetranychus urticae*,  
92 transcriptomic analysis of populations that developed pesticide resistance or that were  
93 exposed to challenging host plants reveals the presence of common adaptive responses and  
94 identified key gene candidates for xenobiotic adaptation in this polyphagous mite<sup>25</sup>

95

96 Experimental evolution in artificial metapopulations provides a unique formal test to  
97 understand to which degree spatial variation in habitat availability affects life history  
98 divergence<sup>26</sup>. Using this approach, we studied phenomic divergence of replicated spider mite  
99 populations *T. urticae* that evolved in three types of artificial metapopulations. Following  
100 theoretical expectations outlined above, and the earlier documented demographic changes<sup>6</sup>  
101 we derived the following predictions on life history evolution for mainland-island and  
102 classical metapopulations, relative to patchy metapopulations where habitat is constantly  
103 available in time and space:

104

- 105 1. Asymmetry in patch and population size in mainland-island metapopulations selects  
106 for lower dispersal rates, while in classical metapopulations, the spatiotemporal  
107 variation in population size leads to higher evolved dispersal rates

- 108        2. Increased local extinction rates and local population variability in classical  
109            metapopulation selects for faster life histories, i.e. increased fecundity, decreased  
110            longevity and/or reduced developmental time
- 111        3. Low local and metapopulation variability in mainland-island metapopulations  
112            increase local competition and therefore select for a more male-biased sex ratio  
113            and/or increased developmental time (age-at-maturity).

## 114 **Results**

### 115 **Population-level divergence in life history traits**

116 Experimental evolution caused significant divergence in life history traits of the variable  
117 treatments with the homogeneous treatment (PERMANOVA  $F_2= 2.75$ ;  $p=0.03$ ) (Fig. 1A).  
118 MANOVA analyses showed sex-ratio ( $F_2=7.77$ ;  $p=0.02$ ) and fecundity ( $F_2=10.35$ ;  $p=0.01$ ) as  
119 the two main life history endpoints underlying this divergence. A detailed analysis on the  
120 individual trait distribution after experimental evolution confirmed divergence in fecundity  
121 and sex ratio, but also in longevity (Table 1; Fig 2). An analysis of the trait variation at the  
122 start of the experiment is provided in supplementary material S2.

123

124 The average proportion of male offspring was higher in clutches originating from the SPA  
125 metapopulations ( $0.34 \pm 0.02SE$ ) relative to the HOM ( $0.26 \pm 0.02SE$ ). Mites from the SPA  
126 and TEM treatment evolved a high daily fecundity ( $t=-3.79$ ;  $p=0.01$ ) than those from the  
127 HOM treatment (respectively  $5.21 \pm 0.28SE$  and  $5.59 \pm 0.28SE$  versus  $4.31 \pm 0.25SE$ ). Similarly,  
128 mites that evolved in the SPA ( $35.20 \pm 2.01SE$ ) and TEM treatment ( $36.91 \pm 2.1SE$ ) had a  
129 significantly higher fecundity ( $t=-3.53$ ,  $p=0.0014$ ) than those from the reference population  
130 HOM ( $27.61 \pm 2.01SE$ ).

131

132 Mites that evolved in the TEM metapopulations died earlier (after  $9.65 \pm 0.42SE$  days) than  
133 mites from homogeneous (HOM) metapopulations (after  $11.24 \pm 0.45SE$  days) and spatial  
134 variable (SPA) metapopulations (after  $11.62 \pm 0.47SE$  days) (Fig. 2C). Under the prevailing lab  
135 conditions, males developed in 7.99 days on average while the female reached maturity  
136 after 8.40 days ( $t=-3.28$ ;  $p=0.0010$ ). Mites from homogeneous metapopulations reached  
137 maturity earlier ( $7.97 \pm 0.12$ ) than mites from the spatially heterogeneous (SPA)  
138 metapopulation ( $8.43 \pm 0.11$ ) ( $t=-2.85$ ;  $p=0.012$ ) (Fig. 2D). The interaction between sex and  
139 treatment was not significant ( $F_{2,2228}=0.25$ ;  $p=0.78$ ). No significant differences in juvenile  
140 survival of mites among treatments were observed ( $F_{2,7,201}=0.25$ ;  $p=0.79$ ), and no differences  
141 were detected in aerial dispersal propensity ( $F_{2,5,185}=0.02$ ;  $p=0.98$ ).

142

143 The simulated growth rate at the start of the experiment was 3.56 (SD=0.19). After  
144 experimental evolution, growth rates were slightly lower in the homogeneous  
145 metapopulation treatment relative to the other two, but this difference was not significant

146 based on the inferred 95% confidence intervals ( $r_{\text{Hom}}=3.38$ ,  $SD=0.21$ ;  $r_{\text{TEMP}}=3.52$ ;  $SD=0.20$ ;  
147  $r_{\text{SPA}}=3.55$ ,  $SD=0.19$ ).

148

#### 149 **Divergence in physiological endpoints**

150 Although not significant ( $F_{2,32}=3.08$ ;  $p=0.06$ ), a trend towards a lower mass per 50 mites was  
151 observed for mites from homogeneous metapopulations ( $424 \pm 25\text{SE } \mu\text{g}$ ) compared to mites  
152 from metapopulations with spatial ( $510 \pm 25\text{SE } \mu\text{g}$ ) or spatiotemporal variation ( $441 \pm 31\text{SE}$   
153  $\mu\text{g}$ ). Glucose levels were significantly different among the metapopulation treatments  
154 ( $F_{2,67}=3.52$ ;  $p=0.03$ ; Fig. 3), with the lowest levels for HOM ( $1.39 \pm 0.25\text{SE}$ ) relative to those  
155 from SPA ( $2.33 \pm 0.25\text{SE}$ ) ( $t=-2.64$ ;  $p=0.027$ ). No significant differences in trehalose  
156 ( $F_{2,60}=0.43$ ;  $p=0.51$ ) or triglyceride level were observed among treatments ( $F_{2,56}=2.07$ ;  
157  $p=0.14$ ).

158

#### 159 **Divergence in gene expression**

160 Based on genome-wide gene-expression data of adult female mites raised under common  
161 garden for two generations, SPA and TEM treatments diverged from the control HOM  
162 regime, in a parallel direction (Fig. 1B). We found 152 and 181 differentially expressed genes  
163 in SPA and TEM lines, respectively, using the HOM treatment as reference (FDR-corrected  $p$ -  
164 value  $<0.05$  and  $\log_2$ -converted  $FC>0.585$ ) (Fig. 4). Fig. S1 depicts the expression patterns of  
165 the triplicated lines within each treatment separately. Of these differentially expressed  
166 genes, 81.6% and 70.7% exhibited down-regulation in SPA and TEM, relative to HOM,  
167 respectively (Fig. 4, Fig. S2). Pearson correlation indicated that the altered transcript levels in  
168 SPA and TEM were significantly correlated ( $\rho=0.80$ ,  $df=260$ ,  $p<0.0001$ ).

169

170 Using Blast2GO<sup>27</sup>, a total of 164 Biological Process GO-sets were assigned to the  
171 differentially expressed genes that were associated with evolution in the TEM and SPA  
172 regimes. Approximately half of these GO-terms ( $n=84$ ) were present in both treatments.  
173 Twenty gene sets were significantly up- and down-regulated in either the SPA or TEM  
174 regimes, relative to HOM (Fig. 5). The associated labels of the GO-IDs are listed in Table S1.  
175 Using this GSA, we observed a convergence in the down-regulation of genes involved in  
176 methionine biosynthesis (Fig. S3). In contrast, the transcriptional responses to TEM and SPA  
177 selection pressures diverged in the gene sets of which members were associated with

178 gluconeogenesis and interconnected pathways and in gene sets of which members code for  
179 glycoside hydrolases (Fig. 5 and Fig. S2).

180

### 181 **Population performance on novel hosts**

182 After one week of challenging the novel host, mite survival did not differ according to the  
183 spatial setting to which they evolved ( $F_{2,122}=2.19$ ;  $p=0.12$ ). However, significant differences in  
184 fecundity were observed ( $F_{2,122}=66.81$ ;  $p<0.0001$ ), with a lower number of deposited eggs in  
185 mites that evolved in the homogeneous populations ( $49.33 \pm 1.07SE$  eggs) relative to SPA  
186 ( $68.29 \pm 1.29SE$  eggs) and TEM ( $55.83 \pm 1.17$  eggs). All pairwise differences were significant  
187 (Fig.6A). After three weeks, the first cohort of offspring matured which differed in  
188 population size among treatments ( $F_{2,5.635}=5.83$ ;  $p=0.04$ ; Fig. 6B). Again, population sizes  
189 were lowest in mites originating from HOM ( $5 \pm 0.90SE$ ) relative to SPA ( $10.26 \pm 1.71SE$ ) and  
190 TEM ( $10.62 \pm 1.77SE$ ).

191

192



## 193 Discussion

194 While there is an increasing awareness that changes in spatial structure affect population  
195 dynamics, and that these ecological dynamics interact with evolutionary trajectories, there is  
196 a limited understanding of how these reciprocal eco-evolutionary interactions are governed  
197 by metapopulation-level selection pressures. We followed a phenomic approach in which we  
198 contrasted life history traits, physiological endpoints and transcriptomes from mites that  
199 evolved in classical and mainland-island metapopulations with those that evolved in stable  
200 patchy metapopulations. Using stable patchy metapopulations (HOM) as a reference, mites  
201 from the spatially (mainland-island, SPA) and spatiotemporally (classical, TEM) variable  
202 metapopulations showed evolutionary convergence in traits related to size and fecundity  
203 and in its transcriptional regulation of methionine biosynthesis. However, these mites  
204 equally evolutionary diverged in longevity, sex ratio, glucose content and in the expression  
205 of genes involved in gluconeogenesis and that code for glycoside hydrolases (Fig. S2).

206  
207 Relative to HOM, spatiotemporal variation in habitat availability in the classical  
208 metapopulations (TEM) generated high levels of local variation in population density and on  
209 average lower metapopulation sizes due to frequent patch extinctions and lagged  
210 colonisation dynamics<sup>6</sup>. Mites evolving in these metapopulations showed a significant  
211 down-regulation of transcription of genes associated with gluconeogenesis and ATP  
212 production (Fig. S2). Genes of the gluconeogenesis pathway affect various metabolic fluxes  
213 and energy production and are known to influence life history traits (e.g. dispersal, life span  
214 and basal metabolic rate), which determine survival in a metapopulation structure. Here,  
215 mite adaptation to spatiotemporal dynamics led to an increased fecundity and reduced  
216 longevity, which may have been mediated by the transcriptional changes in their  
217 gluconeogenesis pathway (Fig S2). These altered traits reflect a change in resource allocation  
218 between survival and reproduction<sup>28</sup>, leading to the evolution of more *r*-strategic traits<sup>29,30</sup>.

219  
220 Mainland-island metapopulations (SPA) are characterised by both a low local and  
221 metapopulation-level variability in population size, large metapopulation sizes and low  
222 metapopulation-level dispersal<sup>6</sup>. We detected a similar trend of reduced dispersal at the  
223 individual level -in line with theoretical predictions<sup>29</sup>, but more importantly an evolution

224 towards more male biased, fecund and slowed aging strategies relative to mites from patchy  
225 metapopulations (HOM). Sex ratio changes are known to evolve in response to local  
226 resource<sup>12</sup> or mate competition<sup>9</sup>. While mites from stable metapopulations with low  
227 dispersal and stable local population sizes are expected to evolve more female biased sex-  
228 ratios due to elevated kin-competition, our results point in the direction of resource  
229 competition. Spider mites show scramble competition, with fast resource depletion when  
230 population sizes are high<sup>31</sup>. As such, slowing down population growth by extending age-at-  
231 maturity<sup>14,32</sup> and more male-biased sex ratios<sup>33,34</sup> can be considered as an adaptive strategy  
232 under stable conditions and elevated resource competition. The significantly higher  
233 transcription in gene sets that code for glycoside hydrolases, enzymes which are crucial for  
234 the digestion of complex carbohydrates in an arthropod herbivore's diet<sup>35</sup>, can be regarded  
235 as a consequence of mite adaptation to the stable conditions. Interestingly, two of the  
236 differentially expressed *GH* genes (*tetur29g01280* and *tetur29g01230*) were horizontally  
237 transferred and code for glycoside hydrolases of the GH32 family<sup>36</sup>.

238

239 Despite the evolved divergent phenotypic profiles reported above, life history traits and  
240 genome-wide gene-expression showed an overall convergence in the spatial and  
241 spatiotemporal variable metapopulation configurations, relative to the stable patchy one.  
242 This was unexpected since the HOM (meta-)population dynamics are intermediately situated  
243 between the SPA and TEM regimes. The convergence is apparent in (a) similar evolution of  
244 higher fecundity rates and to a lesser degree sex-ratio, age and mass-at-maturity, (b) and  
245 increased glucose content and (c) the identical direction of the differential expression of 71  
246 genes (including genes of the methionine anabolic pathway; see Fig. S3). Increased fecundity  
247 shows trade-offs with longevity and sex ratio in respectively the TEM and SPA  
248 metapopulation. Therefore, mites did not evolve an increased per capita growth rate and on  
249 average reached maturity at later age. A slower growth, larger size at maturity are typically  
250 traits associated with competitive environments<sup>37</sup>. For the SPA treatment, such increased  
251 competitive interactions have been discussed higher, but densities were on average lower in  
252 the TEM treatments<sup>6</sup>, rendering high densities as a common competitive environment a  
253 poor explanation for the detected convergence. In relative terms, however, high densities in  
254 the SPA treatments and resource limitation combined with unoccupied patches in the TEM  
255 treatment must have led to more frequent episodes of *per capita* resource shortage, relative

256 to the stable HOM metapopulations. Elevated glucose levels have been associated with  
257 responses to cope with increased starvation resistance in a ground beetle<sup>38</sup> and are typically  
258 associated with low metabolic rates under food limitation<sup>39,40</sup>. The decreased developmental  
259 rates, the higher glucose levels of mites from the SPA and TEM are thus in concordance with  
260 evolutionary trajectories towards stress resistance<sup>41</sup>.

261

262 Our theory of a general stress response was further supported by the transcriptional  
263 responses. First, identical expression profiles of a GO-term related to methionine synthesis  
264 indicates a common response that could interfere with methylation processes. Such  
265 methylation is often induced by general, oxidative stresses, for instance –and in line with our  
266 findings- due to compensatory growth after food restriction<sup>42</sup>. Significantly up-and down-  
267 regulated gene sets upon adaptation to (spatio)temporal stress included sets that are  
268 associated with basal metabolic pathways. Genetic changes in these pathways are a  
269 common response to environmental stressors, with enzymes of the  
270 gluconeogenesis/glycolysis and citric acid pathways as one of the prime targets<sup>43</sup>.

271

272 Adaptive metabolic changes are known to lead to the development of cross-tolerance in  
273 organisms, enabling organisms to cope with unfamiliar stressors. We demonstrated that  
274 evolutionary dynamics resulting from changes of the metapopulation spatial structure, pre-  
275 adapt mites to cope with a challenging novel host. This is an important finding which  
276 definitively needs more study in other (model) organisms. If general, such an evolutionary  
277 response is expected to have a strong impact on community- and food web dynamics under  
278 natural conditions<sup>19</sup>. We show that altered population dynamics due to changes in  
279 metapopulation spatial structure may induce general stress resistance responses. Since  
280 multiple stressors are jointly operational under global change, evolutionary responses  
281 towards changes in spatial structure can thus enable organisms of some species to cope with  
282 additional stressors like changes in habitat quality and pollution (i.e., evolutionary rescue;  
283 <sup>23</sup>).

284

## 285 **Materials and methods**

### 286 **Experimental setup of the artificial metapopulations**

287 Metapopulation dynamics of *Tetranychus urticae* were studied using experimental  
288 microcosms. We used as a base population the “LS-VL” *T. urticae* strain, because it is known  
289 to be highly evolvable due to its genetic variability<sup>44,45</sup>. Artificial metapopulations consisted  
290 of a transparent plastic box with 9 patches arranged in a 3 x 3 lattice. We constructed three  
291 types of artificial metapopulations with an equal metapopulation-level carrying capacity but  
292 varying spatial configuration of the patches. Patches were detached bean (*Phaseolus vulgaris*  
293 *L.*) leaves placed on a Tanglefood layer in closed boxes. This hostile matrix prevents mites  
294 from leaving the patches. Bean leaves were renewed on a weekly basis to avoid starvation of  
295 the mites. The size of the bean leaves introduced to each patch was dependent upon the  
296 treatment. Two times a week, for 8 hours a wind current (1.5m/s) was induced by a fan and  
297 allowed aerial dispersal. Three metapopulation types were installed each of which was  
298 replicated three times:

299

- 300 i) a patchy metapopulation consisting of nine patches weekly refreshed with leaves  
301 of 20 cm<sup>2</sup> (spatially homogenous distribution of resources; further referred to as  
302 HOM)
- 303 ii) a mainland-island metapopulation consisting of three patches of standard leaf  
304 size (20 cm<sup>2</sup>) and three of double size; another three patches of these  
305 metapopulations remained constantly empty (spatial heterogeneous distribution  
306 of resources; further referred to as SPA)
- 307 iii) a spatiotemporal heterogeneous metapopulation (further referred to as TEM) in  
308 which we assigned nine single-patch resources (standard leaf) randomly to one of  
309 the nine patches. Due to this algorithm, the distributions of the resources (and  
310 thus local carrying capacity or island size) changed weekly among the nine  
311 patches and varied between zero (no resource renewal and local extinction) and  
312 double or exceptionally triple island size. In consequence, patch sizes and thus  
313 local carrying capacities fluctuated over time and space, but we ensured again a  
314 constant metapopulation carrying capacity (9 x 20 cm<sup>2</sup>) over time.

315

316 At the beginning of the experiment, 20 randomly collected adult female mites, from the base  
317 population, were assigned to each patch within each metapopulation type and allowed to  
318 establish the triplicated populations. All metapopulations were kept under controlled  
319 conditions (23°C, 16:8 LD photoperiod, 85% humidity).

320

### 321 **Quantification of mite life-history**

322 Spider mite life-history traits were measured at the initiation of the experiment and after 10  
323 months, corresponding to approximately 30 mite generations. All traits were measured on  
324 F2 mites (raised for two generations in common garden on detached leaf discs) to minimise  
325 maternal and environmental effects caused for instance by local conditions of crowding.  
326 Young inseminated females of each experimental metapopulation were individually allowed  
327 to oviposit on bean leaf discs. Leaf discs were placed with the abaxial part upwards on  
328 moistened filter paper to prevent mites from escaping and to maintain leaf turgor. Different  
329 life history parameters of the descendants were recorded daily: juvenile survival,  
330 developmental time (time from egg until the adult stage), fecundity (daily number of eggs),  
331 longevity and sex-ratio. Since spider mites deposit the majority of their eggs during the first  
332 seven days after maturity, we monitored fecundity only during that period. Dispersal  
333 propensity of the mites was assessed by transferring mated females to test arenas for trials  
334 of aerial dispersal (after two whole generations under common garden to avoid confounding  
335 maternal effects). The experimental setup for aerial dispersal assessment was identical to  
336 the one applied in<sup>46</sup> (details in supplementary material S1).

337

### 338 **Mite performance**

339 Mite performance was followed by quantifying rate of intrinsic growth as a proxy of  
340 fitness<sup>13</sup>. To detect possible differences in individual performance between treatments, an  
341 integrated individual-level fitness measure, the rate of intrinsic growth ( $r_m$ ), was calculated  
342 by combining the estimated parameter distributions of the different life history parameters  
343 according (see statistical analyses) to the equation  $\sum e^{-r_m x} l_x f_x = 1$  (with  $l_x$  survival till maturity  
344  $x$  and  $f_x$  the number of female offspring at age  $x$ ) which represents the contribution of each  
345 female to the number of females in the subsequent generation. We performed 10000  
346 simulations and reported the mean value and standard deviation while testing its

347 significance in comparing whether 2.5% tails of the distribution overlap. We additionally  
348 measured a set of physiological endpoints (mass, glucose, trehalose and triglycerid levels)  
349 after the common garden treatment at the start of the experiment and after 30 generations  
350 of selection in a metapopulation context as indicators for mite performance. All physiological  
351 parameters were measured following<sup>38</sup> on F2 mites (see suppl. material S1).

352

### 353 **Differential gene expression after experimental evolution**

354 To examine the effects of metapopulation structure on the mite transcriptome, Agilent dual  
355 colour gene expression micro-array analysis was performed on female mites raised for two  
356 generations in a common garden of every selection regime. The microarray data have been  
357 deposited in the Gene Expression Omnibus (GEO) (accession number: GSE55623). For the  
358 hierarchical clustering, data of previous *T. urticae* studies were incorporated<sup>33,47</sup>. Final  
359 statistical processing and analysis was conducted in limma (Smyth 2005). Gene Ontology  
360 (GO) annotation was executed using Blast2GO software<sup>27</sup>. Using the Blast2GO generated  
361 annotation and the statistical output of limma as input, Gene Set Analysis (GSA) was  
362 performed with the Bioconductor package piano (Parametric Analysis of Gene set  
363 Enrichment, PAGE)<sup>48</sup>. More details of the gene expression and GO-term analysis are  
364 provided in supplementary material S1.

365

### 366 **Performance on a challenging new host**

367 Our LS-VL base population has been maintained on bean for more than 10 years. We  
368 assessed performance on a novel suboptimal host by quantifying isofemale growth rate on  
369 tomato (*Solanum lycopersicum*; variety Moneymaker) grown under controlled laboratory  
370 conditions (23°C, 16:8 L:D photoperiod). Experimental arenas were constructed with leaves  
371 from 4-week old tomato plants. Moist tissue paper was used to cover 10 cm<sup>2</sup> leaf edges that  
372 prevented mites from escaping. Twenty fertilized F2 females (raised for two generations in  
373 common garden to reduce maternal and environmental effects) from each artificial  
374 metapopulation were placed on a leaf-arena and allowed to establish a population. All leaf-  
375 arenas were kept under controlled conditions (23°C, 16:8 L:D photoperiod). Population  
376 growth was assessed weekly for 3 weeks by counting the number of eggs, juveniles, adult  
377 males and females.

378

## 379 **Statistical analysis**

380 Because the measured traits follow different statistical distributions, we first tested for  
381 multivariate differences in the measured traits after experimental evolution by applying a  
382 Permutational Multivariate Analysis of Variance (PERMANOVA). Because our measurements  
383 were taken with different units on different scales, the correctly estimated replicate-level  
384 averages of the life history and physiological endpoints (see GLMM further) were scaled  
385 prior to PERMANOVA analysis based on Euclidean distances among replicates belonging to  
386 one of the three metapopulation treatments (PERMANOVA; with ADONIS function in R;<sup>49</sup>. To  
387 visualise metapopulation divergence based on life history, Nonmetric Multidimensional  
388 Scaling (NMDS) analyses were performed on the scaled distance matrix (all life history and  
389 physiological traits) using the METAMDS function (vegan library, R.2.15.1;). The significantly  
390 diverging traits were subsequently identified by a Multivariate Analysis of Variance  
391 (MANOVA) on the scaled averaged data per replicate.

392

393 We examined how metapopulation type affected the different life history traits and  
394 physiological endpoints using generalized linear mixed models (GLMM). The model included  
395 metapopulation type (HOM, SPA, TEM) as fixed factor and each individual metapopulation as  
396 a random effect to control for dependency among replicates from each metapopulation  
397 treatment. Depending on the dependent variable, a Gaussian (all physiological endpoints),  
398 Poisson (fecundity, developmental time, longevity and population size on the novel host) or  
399 binomial error (sex ratio, juvenile mortality) structure was modelled with appropriate link  
400 functions. Non-significant contributions ( $P > 0.05$ ) were removed by backwards procedure.  
401 Effective degrees of freedom were estimated using Kenward-Rogers procedure. All analyses  
402 were conducted with SAS 9.3 (SAS Institute Inc 2006) by using the GLIMMIX procedure.

403

404

## 405 **Acknowledgements**

406 This project was funded by FWO projects G.0610.11 and G.0093.12N and Belspo-IAP project  
407 Speedy. ADR was funded by BOF-Ugent. NW was supported by the Institute for the  
408 Promotion of Innovation by Science and Technology in Flanders (IWT, grant

409 IWT/SB/101451). DR was supported by the Observatoire des Sciences de l'Univers de Rennes  
410 (OSUR).

411

## 412 **References**

- 413 1. Dirzo, R. & Raven, P. H. GLOBAL STATE OF BIODIVERSITY AND LOSS. *Annu. Rev.*  
414 *Environ. Resour.* **28**, 137–167 (2003).
- 415 2. Levins, R. The effect of random variations of different types on population growth.  
416 *Proc. Natl. Acad. Sci. U. S. A.* **62**, 1061–1065 (1969).
- 417 3. Hanski, I. Metapopulation dynamics. *Nature* **396**, 41–49 (1998).
- 418 4. Harrison, S. & Taylor, A. D. in *Metapopulation biology: ecology, genetics, and*  
419 *evolution* 27–42 (1997).
- 420 5. Fronhofer, E. A., Kubisch, A., Hilker, F. M., Hovestadt, T. & Poethke, H. J. Why are  
421 metapopulations so rare? *Ecology* **93**, 1967–1978 (2012).
- 422 6. De Roissart, A., Wang, S. & Bonte, D. Spatial and spatiotemporal variation in  
423 metapopulation structure affects population dynamics in a passively dispersing  
424 arthropod. *J. Anim. Ecol.* (2015). doi:10.1111/1365-2656.12400
- 425 7. Olivieri, I., Couvet, D. & Gouyon, P. H. The genetics of transient populations: Research  
426 at the metapopulation level. *Trends Ecol. Evol.* **5**, 207–210 (1990).
- 427 8. Travis, J. M. J. & Dytham, C. Habitat persistence, habitat availability and the evolution  
428 of dispersal. *Proc. R. Soc. B Biol. Sci.* **266**, 723 (1999).
- 429 9. Macke, E., Magalhaes, S., Bach, F. & Olivieri, I. Experimental Evolution of Reduced Sex  
430 Ratio Adjustment Under Local Mate Competition. *Science* **334**, 1127–1129 (2011).
- 431 10. Dytham, C. & Travis, J. Evolving dispersal and age at death. *Oikos* **113**, 530–538  
432 (2006).
- 433 11. Bierbaum, Mueller & Ayala. Density-dependent evolution of life-history traits in  
434 *Drosophila melanogaster*. *Evolution (N. Y.)*. **43**, 382–392 (1989).
- 435 12. Clark, A. B. Sex ratio and local resource competition in a prosimian primate. *Science*  
436 **201**, 163–5 (1978).
- 437 13. Cameron, T. C., O'Sullivan, D., Reynolds, A., Piertney, S. B. & Benton, T. G. Eco-  
438 evolutionary dynamics in response to selection on life-history. *Ecology Letters* **16**,  
439 754–763 (2013).



- 440 14. Cameron, T. C., Plaistow, S., Mugabo, M., Piertney, S. B. & Benton, T. G. *Eco-*  
441 *Evolutionary Dynamics in a model system. Advances in Ecological Research* **50**,  
442 (Elsevier, 2014).
- 443 15. Margulis, L. & Sagan, D. *What Is Life?* (University of California Press, 2000).
- 444 16. Parsons, P. A. Environments and evolution: interactions between stress, resource  
445 inadequacy and energetic efficiency. *Biol. Rev. Camb. Philos. Soc.* **80**, 589–610 (2005).
- 446 17. Bell, G. & Gonzalez, A. Adaptation and evolutionary rescue in metapopulations  
447 experiencing environmental deterioration. *Science* **332**, 1327–1330 (2011).
- 448 18. Hanski, I. & Mononen, T. Eco-evolutionary dynamics of dispersal in spatially  
449 heterogeneous environments. *Ecol. Lett.* **14**, 1025–34 (2011).
- 450 19. Farkas, T. E., Mononen, T., Comeault, A. A., Hanski, I. & Nosil, P. Evolution of  
451 camouflage drives rapid ecological change in an insect community. *Curr. Biol.* **23**,  
452 1835–1843 (2013).
- 453 20. Gomulkiewicz, R. & Holt, R. D. When does Evolution by Natural Selection Prevent  
454 Extinction? *Evolution* **43**, 201–207 (1995).
- 455 21. Travis, J. M. J. *et al.* Dispersal and species' responses to climate change. *Oikos* **122**,  
456 1532–1540 (2013).
- 457 22. Boeye, J., Travis, J. M. J., Stoks, R. & Bonte, D. More rapid climate change promotes  
458 evolutionary rescue through selection for increased dispersal distance. *Evol. Appl.* **6**,  
459 353–364 (2013).
- 460 23. Carlson, S. M., Cunningham, C. J. & Westley, P. A. H. Evolutionary rescue in a changing  
461 world. *Trends in Ecology and Evolution* **29**, 521–530 (2014).
- 462 24. Wheat, C. W. in *Dispersal ecology and evolution* (eds. Clobert, J., Baguette, M.,  
463 Benton, T. & Bullock, J.) 95–107 (Oxford University Press, 2012).
- 464 25. Dermauw, W. *et al.* A link between host plant adaptation and pesticide resistance in  
465 the polyphagous spider mite *Tetranychus urticae*. *Proc. Natl. Acad. Sci. U. S. A.* **110**,  
466 E113–22 (2013).
- 467 26. Kawecki, T. J. *et al.* Experimental evolution. *Trends in Ecology & Evolution* **27**, 547–560  
468 (2012).
- 469 27. Conesa, A. *et al.* Blast2GO: A universal tool for annotation, visualization and analysis in  
470 functional genomics research. *Bioinformatics* **21**, 3674–3676 (2005).
- 471 28. Magalhães, S., Fayard, J., Janssen, A., Carbonell, D. & Olivieri, I. Adaptation in a spider  
472 mite population after long-term evolution on a single host plant. *J. Evol. Biol.* **20**,  
473 2016–2027 (2007).

- 474 29. Ronce, O., Perret, F. & Olivieri, I. Landscape dynamics and evolution of colonizer  
475 syndromes: Interactions between reproductive effort and dispersal in a  
476 metapopulation. *Evol. Ecol.* **14**, 233–260 (2000).
- 477 30. Wheat, C. W. & Hill, J. Pgi: the ongoing saga of a candidate gene. *Curr. Opin. Insect Sci.*  
478 **4**, 42–47 (2014).
- 479 31. Krips, O. E., Witul, A., Willems, P. E. L. & Dicke, M. Intrinsic rate of population increase  
480 of the spider mite *Tetranychus urticae* on the ornamental crop gerbera: intraspecific  
481 variation in host plant and herbivore. *Entomol. Exp. Appl.* **89**, 159–168 (1998).
- 482 32. Monro, K. & Marshall, D. J. Faster is not always better: selection on growth rate  
483 fluctuates across life history and environments. *Am. Nat.* **183**, 798–809 (2014).
- 484 33. Zhurov, V. *et al.* Reciprocal responses in the interaction between *Arabidopsis* and the  
485 cell-content-feeding chelicerate herbivore spider mite. *Plant Physiol.* **164**, 384–99  
486 (2014).
- 487 34. Johnson, C. N. Dispersal and the sex ratio at birth in primates. *Nature* **332**, 726–8  
488 (1988).
- 489 35. Terra, W. R. & Ferreira, C. Insect digestive enzymes: properties, compartmentalization  
490 and function. *Comp. Biochem. Physiol. Part B Comp. Biochem.* **109**, 1–62 (1994).
- 491 36. Grbić, M. *et al.* The genome of *Tetranychus urticae* reveals herbivorous pest  
492 adaptations. *Nature* **479**, 487–92 (2011).
- 493 37. Kawecki, T. J. Age and size at maturity in a patchy environment - fitness maximization  
494 versus evolutionary stability. *Oikos* **66**, 309–317 (1993).
- 495 38. Laparie, M., Larvor, V., Frenot, Y. & Renault, D. Starvation resistance and effects of  
496 diet on energy reserves in a predatory ground beetle (*Merizodus soledadinus*;  
497 Carabidae) invading the Kerguelen Islands. *Comp. Biochem. Physiol. - A Mol. Integr.*  
498 *Physiol.* **161**, 122–129 (2012).
- 499 39. Božič, J. & Woodring, J. Effect of activity on the haemolymph sugar titres in honey  
500 bees. *J. Apic. Res.* (2015).
- 501 40. Packard, G. C. & Boardman, T. J. The use of percentages and size-specific indices to  
502 normalize physiological data for variation in body size: wasted time, wasted effort?  
503 *Comp. Biochem. Physiol. Part A Mol. Integr. Physiol.* **122**, 37–44 (1999).
- 504 41. Sulmon, C. *et al.* Abiotic stressors and stress responses: What commonalities appear  
505 between species across biological organization levels? *Environ. Pollut.* **202**, 66–77  
506 (2015).
- 507 42. De Block, M. & Stoks, R. Compensatory growth and oxidative stress in a damselfly.  
508 *Proc. Biol. Sci.* **275**, 781–5 (2008).

- 509 43. Marden, J. H. Nature's inordinate fondness for metabolic enzymes: Why metabolic  
510 enzyme loci are so frequently targets of selection. *Mol. Ecol.* **22**, 5743–5764 (2013).
- 511 44. Van Leeuwen, T. *et al.* Mitochondrial heteroplasmy and the evolution of insecticide  
512 resistance: non-Mendelian inheritance in action. *Proc. Natl. Acad. Sci. U. S. A.* **105**,  
513 5980–5 (2008).
- 514 45. Fronhofer, E. A., Stelz, J. M. & Lutz, E. Spatially correlated extinctions select for less  
515 emigration but larger dispersal distances in the spider mite *Tetranychus urticae*.  
516 *Evolution (N. Y.)*. **68**, 1838–1844 (2014).
- 517 46. Li, J. & Margolies, D. C. Responses to direct and indirect selection on aerial dispersal  
518 behaviour in *Tetranychus urticae*. *Heredity (Edinb.)*. **72**, 10–22 (1994).
- 519 47. Bryon, A., Wybouw, N., Dermauw, W., Tirry, L. & Van Leeuwen, T. Genome wide gene-  
520 expression analysis of facultative reproductive diapause in the two-spotted spider  
521 mite *Tetranychus urticae*. *BMC Genomics* **14**, 815 (2013).
- 522 48. Våremo, L., Nielsen, J. & Nookaew, I. Enriching the gene set analysis of genome-wide  
523 data by incorporating directionality of gene expression and combining statistical  
524 hypotheses and methods. *Nucleic Acids Res.* **41**, 4378–91 (2013).
- 525 49. Anderson, M. J. PERMANOVA Permutational multivariate analysis of variance. *Austral*  
526 *Ecology* 1–24 (2005).

527

## 528 **Author contributions**

529 ADR, DB & TVL designed the study, ADR & NW performed the research, ADR wrote the first  
530 draft of the manuscript and analyzed the data, and all authors contributed substantially to  
531 revisions.

532

533 The authors declare no competing financial interests.

534

535

536

537 **Figure legends**

538

539 **Figure 1: Visualization of the life history data.** A: nonmetric multidimensional scaling of the  
540 metapopulations showing dissimilarities between metapopulations based on 'Euclidean  
541 distance', B: Hierarchical clustering of the transcriptomic profiles of the three  
542 metapopulation types and the ancestral mite population living in cold conditions (17°C),  
543 relative to a reference strain (London).

544

545 **Figure 2: Effects of variation in metapopulation structure on life history parameters (mean  
546 values  $\pm$  SE) of mites.** A: longevity, B: total fecundity, C: sex ratio (males/total clutch size), D:  
547 developmental time; E: Daily fecundity. Dotted lines represent parameter values before 30  
548 generations of selection. Equal notations indicate non-significant contrast for the respective  
549 measurements. Error bars represent standard errors.

550

551

552 **Figure 3: Effects of variation in metapopulation structure on glucose level (nmol) per 50  
553 mites (mean values  $\pm$  SE).** Equal notations indicate non-significant contrast for the respective  
554 measurements. Error bars represent standard errors.

555

556 **Figure 4: Scatterplot showing the log<sub>2</sub>-converted FC of the differentially expressed genes in  
557 SPA and TEM, using HOM as reference.** The inset represents a Venn-diagram depicting the  
558 number of differentially expressed genes in the TEM and SPA lines, relative to HOM.

559

560 **Figure 5: Gene set analysis of biological processes for differentially expressed genes in  
561 spider mites after adaptation to spatial and spatiotemporal variability.** Nodes and edges  
562 represent gene sets and overlap of members between interconnected sets, respectively.  
563 Using PAGE, red, blue and grey indicate whether a gene set was significantly up-regulated,  
564 down-regulated or not differentially expressed, respectively. Gene sets are labelled with the  
565 GO-ID (corresponding GO-labels are listed in Table S1). Green, orange and purple halos  
566 surrounding nodes show which gene sets code for genes involved in methionine  
567 biosynthesis, gluconeogenesis and interconnected pathways, and genes coding for glycoside  
568 hydrolases, respectively.

569

570 **Figure 6: Effects of long-term evolution in the different metapopulation contexts on**

571 **population growth on a novel host (mean values  $\pm$  SE). A: number of eggs after one week,**

572 B: number of female offspring reaching adulthood after 21 days. Equal notations indicate

573 non-significant contrast for the respective measurements. Error bars represent standard

574 errors.

575

576 **Tables**

577 **Table 1:** Results for fixed effects from mixed linear models with fecundity, developmental  
 578 time, sex-ratio, longevity and juvenile survival as response variable.

| Factor                    | Num df | Den df | F      | p      |
|---------------------------|--------|--------|--------|--------|
| 579                       |        |        |        |        |
| <b>Daily fecundity</b>    |        |        |        | 580    |
| Treatment                 | 2      | 8.732  | 9.34   | 0.0068 |
| Day                       | 1      | 1891   | 693.77 | <.0001 |
| Day*Treatment             | 2      | 1891   | 2.99   | 0.0507 |
| 581                       |        |        |        |        |
| <b>Total fecundity</b>    |        |        |        |        |
| Treatment                 | 2      | 106.2  | 6.79   | 0.0017 |
| <b>Sex-Ratio</b>          |        |        |        |        |
| Treatment                 | 2      | 189.8  | 3.55   | 0.0308 |
| 582                       |        |        |        |        |
| <b>Developmental time</b> |        |        |        |        |
| Treatment                 | 2      | 2228   | 4.09   | 0.0168 |
| Sex                       | 1      | 228    | 10.78  | 0.0010 |
| Treatment*Sex             | 2      | 2228   | 0.25   | 0.7782 |
| 583                       |        |        |        |        |
| <b>Longevity</b>          |        |        |        |        |
| Treatment                 | 2      | 158    | 5.43   | 0.0053 |
| 584                       |        |        |        |        |
| <b>Juvenile survival</b>  |        |        |        |        |
| Treatment                 | 2      | 7.201  | 0.25   | 0.7882 |

582 **Figures**

583

584 **Figure 1**

585

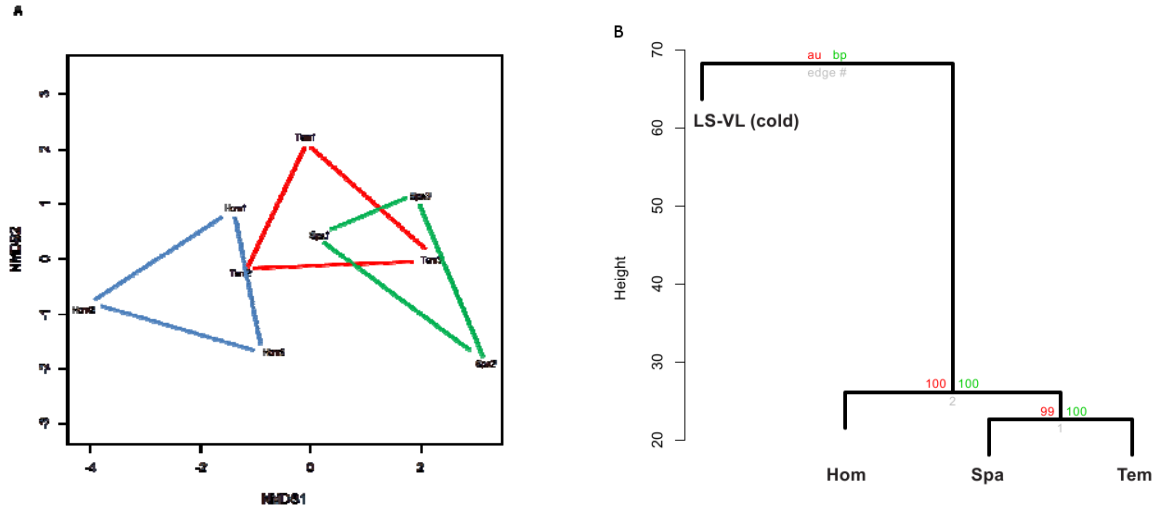

586

587

588 **Figure 2**

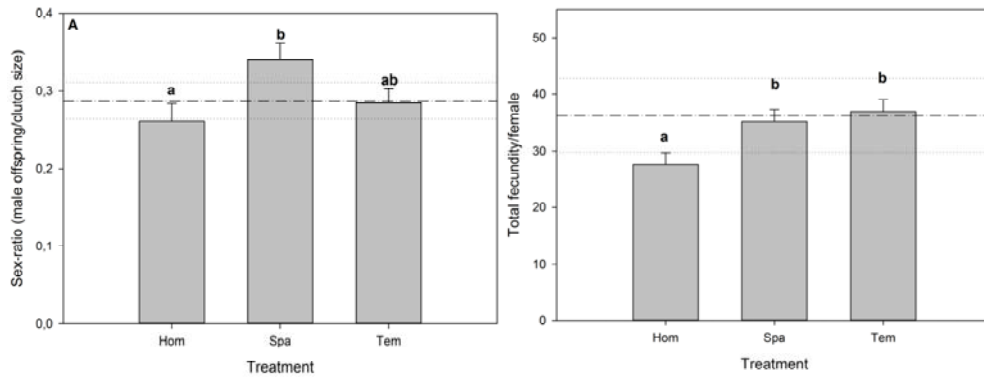

589

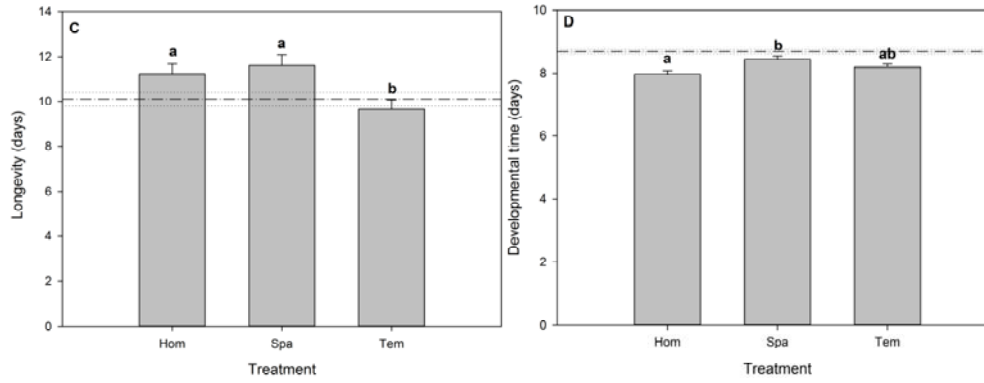

590

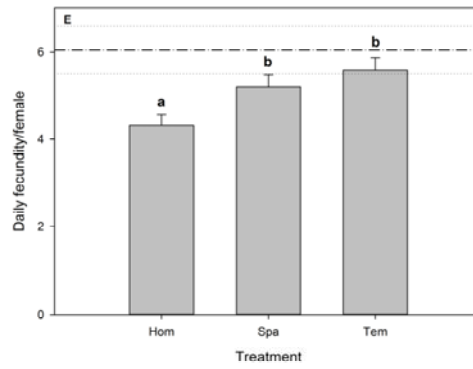

591

592



593 **Figure 3**

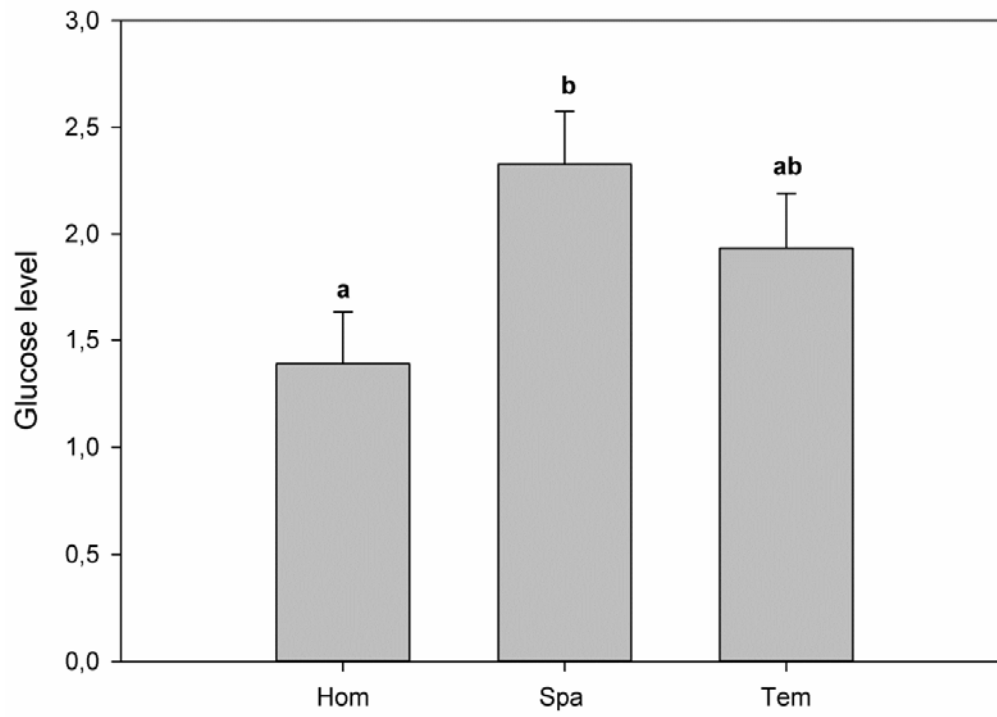

594

595 **Figure 4**

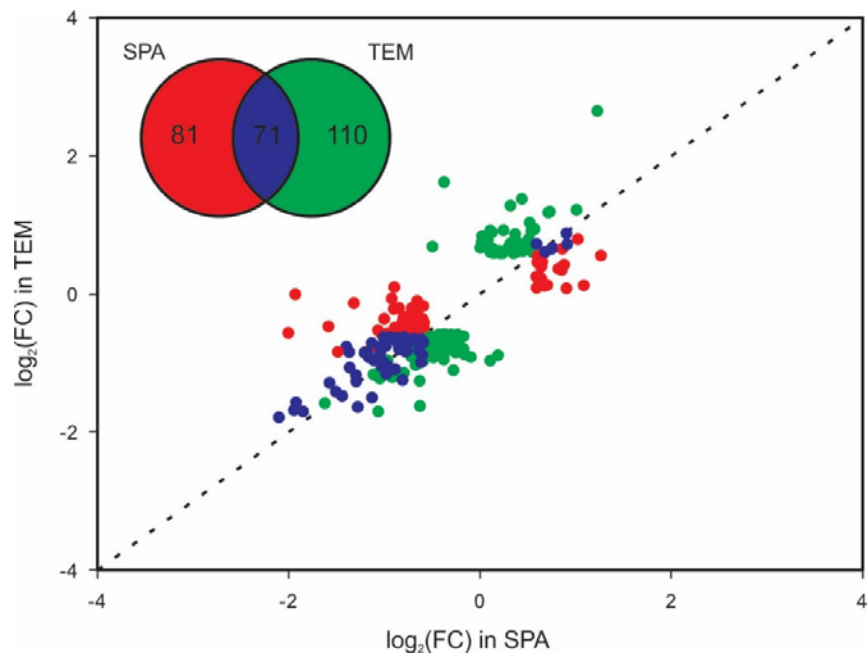

596

597 **Figure 5**

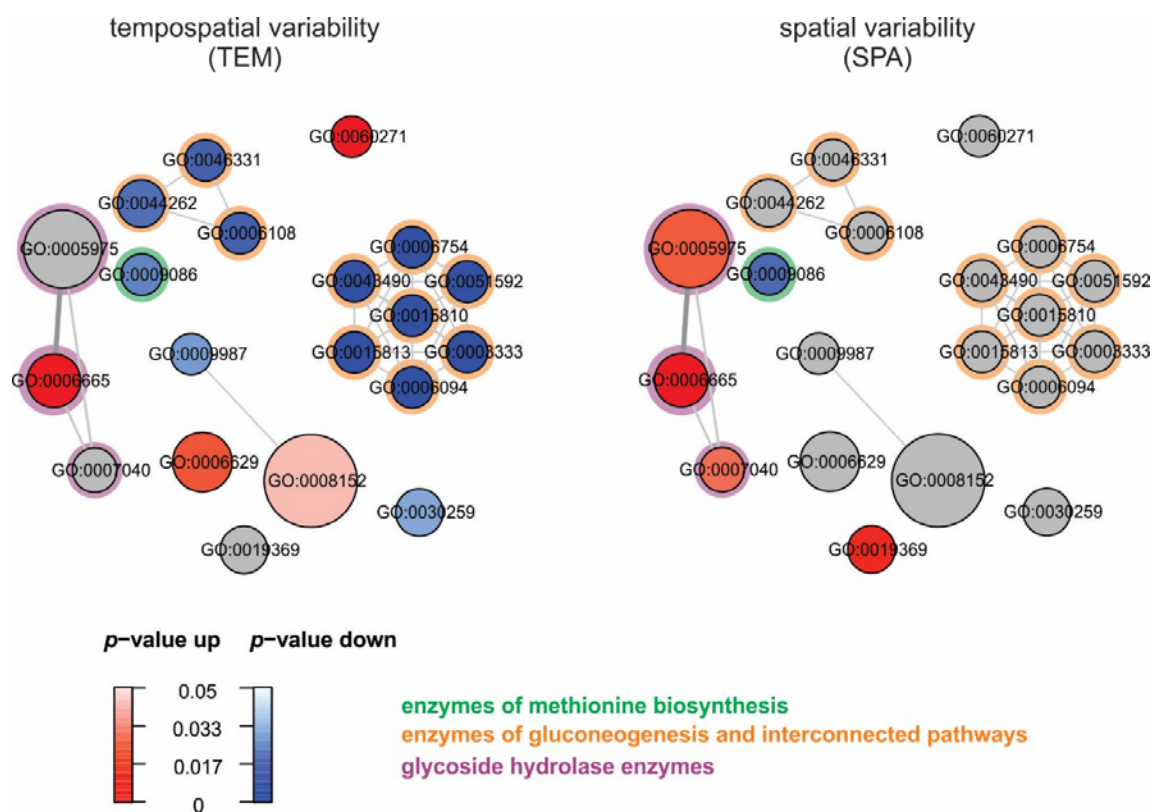

598

599 **Figure 6**

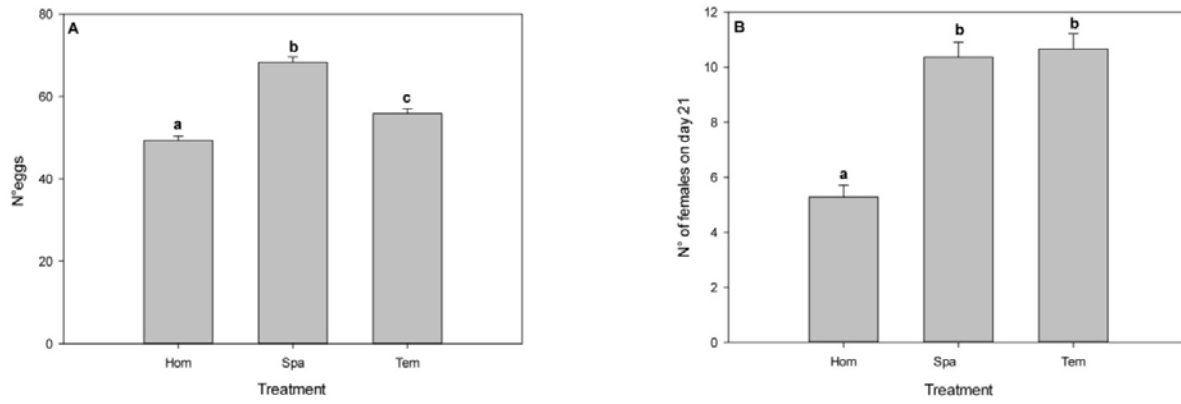

Source: http://biorxiv.org/content/10.1101/021683v1.full.pdf
